# Supplementary material
Source: PubMed Central journal article supplement (PMC6340296)
Supplement: NIHMS999972-supplement-Supplemental_data.pdf [file NIHMS999972-supplement-Supplemental_data.pdf]

## Supplementary Materials

Although this experiment was designed to assess plasticity in neuronal function across development (examined by Age  $\times$  Condition interactions presented in the main text), data on anatomical development (VP-ir and OT-ir cell number) and sex or social condition differences in neural activity (Fos responses and VP/OT-Fos colocalization) may be of interest and are included here. We have excluded effects and interactions of Fos that do not include Condition as a variable because such effects/interactions lack context without condition information; Fos is a proxy marker of neural activity that is specifically in response to something (social condition in the present experiment).

### Results: Nonapeptide neuronal distribution

#### PVN VP

Analysis of VP-ir at rostral and caudal levels yielded similar results and interactions, and so are combined here. We observed a main effect of Age ( $F_{(2,150)} = 15.606$ ;  $p < 0.001$ ; LMM; **Fig. S1A**). PND2 pups exhibited significantly fewer VP-ir neurons compared to PND9 (Mean diff. = 60.228;  $p < 0.001$ ) and PND21 pups (Mean diff. = 58.938;  $p < 0.001$ ).

We found no main effect of Sex ( $F_{(1,150)} = 0.012$ ;  $p = 0.912$ ; LMM) or Condition ( $F_{(2,150)} = 1.170$ ;  $p = 0.393$ ; LMM). In addition, we found no significant interactions for Sex  $\times$  Condition ( $F_{(2,150)} = 0.731$ ;  $p = 0.483$ ; LMM) or Sex  $\times$  Age ( $F_{(2,150)} = 0.025$ ;  $p = 0.975$ ; LMM).

#### PVN OT

Analysis of OT-ir at rostral and caudal levels yielded similar results and interactions, and so are combined here. We observed a main effect of Age ( $F_{(2,150)} = 81.612$ ;  $p < 0.001$ ; LMM; **Fig. S1B**). PND2 pups exhibited significantly fewer OT-ir neurons compared to PND9 (Mean diff. = 119.214;  $p < 0.001$ ) and PND21 pups (Mean diff. = 118.607;  $p < 0.001$ ).

We found no main effect of Sex ( $F_{(1,150)} = 0.882$ ;  $p = 0.349$ ; LMM) or Condition ( $F_{(2,150)} = 2.248$ ;  $p = 0.092$ ; LMM). In addition, we found no significant interactions for Sex  $\times$  Condition ( $F_{(2,150)} = 0.165$ ;  $p = 0.848$ ; LMM) or Sex  $\times$  Age ( $F_{(2,150)} = 1.855$ ;  $p = 0.160$ ; LMM).

#### SON VP

We observed a main effect of Age ( $F_{(2,152)} = 10.031$ ;  $p < 0.001$ ; LMM; **Fig. S1C**). Interestingly, PND21 pups exhibited significantly fewer VP-ir neurons compared to PND2 (Mean diff. = 27.348;  $p = 0.002$ ) and PND9 pups (Mean diff. = 32.963;  $p < 0.001$ ), suggesting neuronal pruning or downregulation of peptide production at an age after PND9 and prior to weaning (PND21).

We found no main effect of Sex ( $F_{(1,152)} = 0.001$ ;  $p = 0.971$ ; LMM) or Condition ( $F_{(2,152)} = 0.201$ ;  $p = 0.818$ ; LMM). In addition, we found no significant interactions for Sex  $\times$  Condition ( $F_{(2,152)} = 2.591$ ;  $p = 0.078$ ; LMM) or Sex  $\times$  Age ( $F_{(2,152)} = 0.611$ ;  $p = 0.544$ ; LMM).

#### SON OT

We found a main effect of Age ( $F_{(2,152)} = 15.955$ ;  $p < 0.001$ ; LMM; **Fig. S1D**). Posthoc analyses revealed that PND2 pups exhibited significantly fewer OT-ir neurons compared to PND9 (Mean diff. = 30.804;  $p < 0.001$ ) and PND21 pups (Mean diff. = 25.772;  $p < 0.001$ ).

We observed no main effect of Sex ( $F_{(1,152)} = 0.382$ ;  $p = 0.538$ ; LMM) or Condition ( $F_{(2,152)} = 0.703$ ;  $p = 0.497$ ; LMM). In addition, we found no significant interactions for Sex  $\times$  Condition ( $F_{(2,152)} = 0.910$ ;  $p = 0.405$ ; LMM) or Sex  $\times$  Age ( $F_{(2,152)} = 0.018$ ;  $p = 0.982$ ; LMM).

### AH VP

Analyses yielded no main effects of Age ( $F_{(1,147)} = 0.478$ ;  $p = 0.621$ ; LMM; **Fig. S1E**), Sex ( $F_{(1,147)} = 1.141$ ;  $p = 0.287$ ; LMM) or Condition ( $F_{(2,147)} = 1.814$ ;  $p = 0.167$ ; LMM). Furthermore, we did not observe significant interactions for Sex  $\times$  Condition ( $F_{(2,147)} = 0.472$ ;  $p = 0.625$ ; LMM) or Sex  $\times$  Age ( $F_{(2,147)} = 0.510$ ;  $p = 0.602$ ; LMM).

### SCN VP

Analyses yielded no main effects of Age ( $F_{(1,148)} = 1.147$ ;  $p = 0.321$ ; LMM; **Fig. S1G**), Sex ( $F_{(1,148)} = 0.728$ ;  $p = 0.395$ ; LMM) or Condition ( $F_{(2,148)} = 3.033$ ;  $p = 0.086$ ; LMM). Furthermore, we did not observe significant interactions for Sex  $\times$  Condition ( $F_{(2,148)} = 1.013$ ;  $p = 0.366$ ; LMM) or Sex  $\times$  Age ( $F_{(2,148)} = 2.299$ ;  $p = 0.104$ ; LMM).

### MPO OT

We observed a main effect of Age ( $F_{(2,154)} = 27.468$ ;  $p < 0.001$ ; LMM; **Fig. S1F**). PND2 pups exhibited significantly fewer OT-ir neurons compared to PND9 (Mean diff. = 3.972;  $p = 0.015$ ) and PND21 pups (Mean diff. = 10.873;  $p < 0.001$ ). In addition, PND9 exhibited significantly fewer OT-ir neurons compared to PND21 pups (Mean diff. = 6.900;  $p < 0.001$ ).

We found no main effect of Sex ( $F_{(1,154)} = 0.627$ ;  $p = 0.430$ ; LMM) or Condition ( $F_{(2,154)} = 2.200$ ;  $p = 0.073$ ; LMM). In addition, we observed no significant interaction for Sex  $\times$  Condition ( $F_{(2,154)} = 0.191$ ;  $p = 0.827$ ; LMM). However, we observed a trending interaction of Sex  $\times$  Age ( $F_{(2,154)} = 2.950$ ;  $p = 0.055$ ; LMM). Posthoc analyses revealed that, similar to the main effect of Age above, that female PND2 pups have significantly fewer OT-ir neurons compared to PND9 pups (Mean diff. = 6.861;  $p = 0.002$ ), but that PND2 and PND9 male pups do not have significantly different OT-ir neuron numbers (Mean diff. = 1.083;  $p = 1.000$ ).

### BST OT

We found a main effect of Age ( $F_{(2,150)} = 17.144$ ;  $p < 0.001$ ; LMM; **Fig. S1H**). Posthoc analyses revealed that PND2 pups exhibited significantly fewer OT-ir neurons compared to PND9 (Mean diff. = 7.852;  $p < 0.001$ ) and PND21 pups (Mean diff. = 7.708;  $p < 0.001$ ).

We observed no main effect of Sex ( $F_{(1,150)} = 2.080$ ;  $p = 0.151$ ; LMM) or Condition ( $F_{(2,150)} = 0.359$ ;  $p = 0.699$ ; LMM). In addition, we found no significant interactions for Sex  $\times$  Condition ( $F_{(2,150)} = 0.650$ ;  $p = 0.524$ ; LMM) or Sex  $\times$  Age ( $F_{(2,150)} = 1.123$ ;  $p = 0.328$ ; LMM).

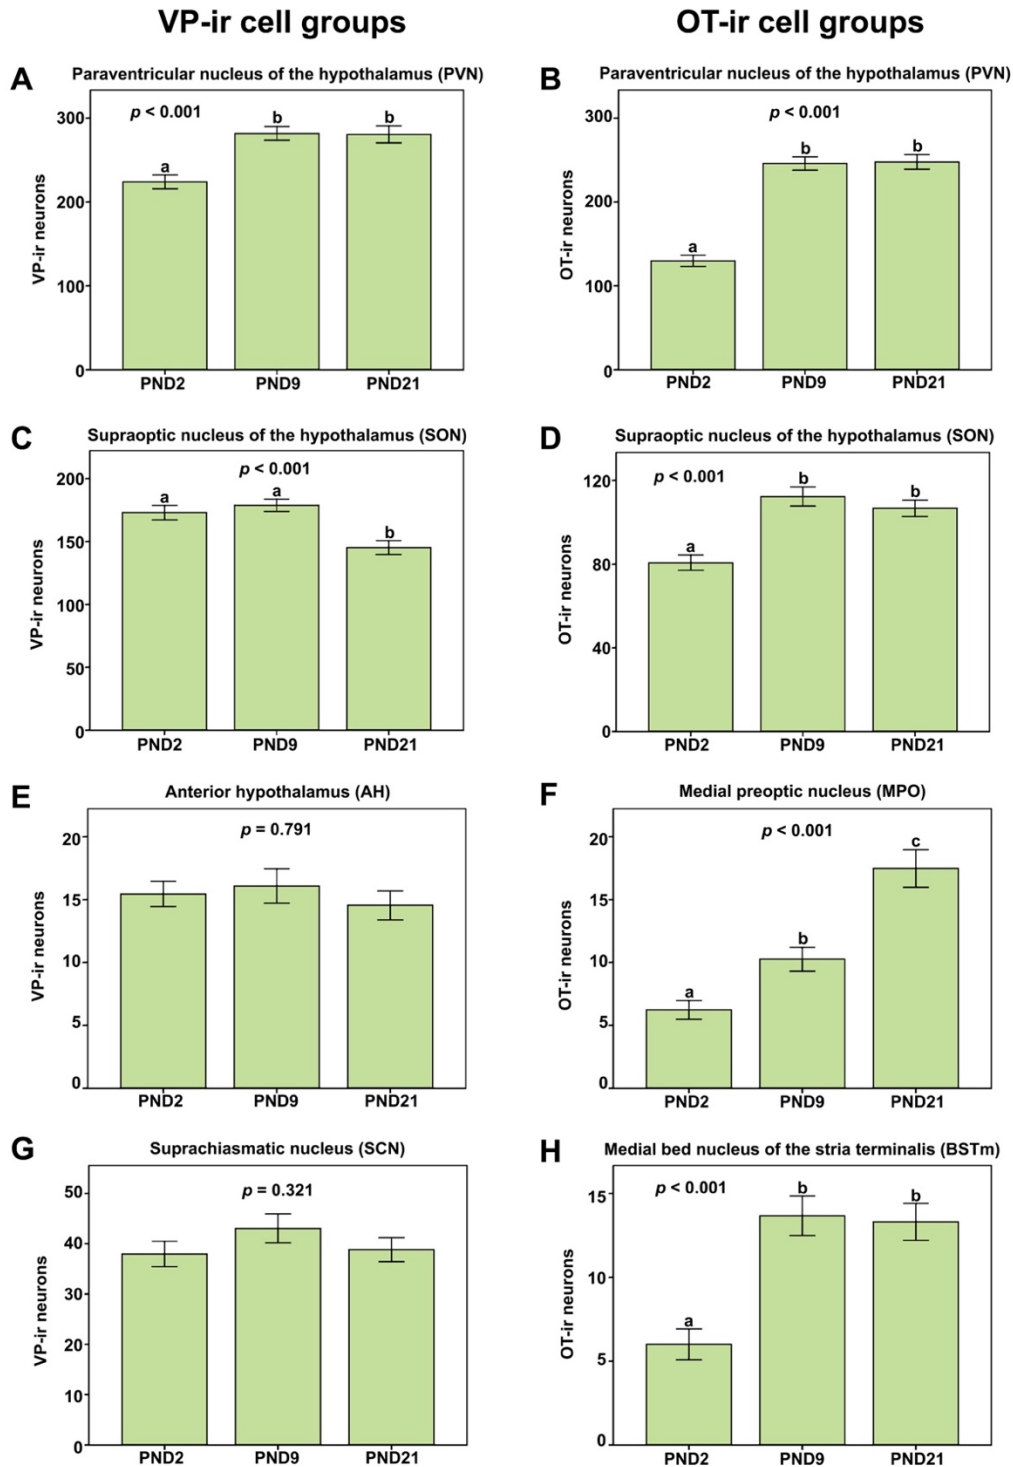

**Fig. S1. Development of nonapeptide neuronal cell groups.** Mean ( $\pm$ SEM) number of vasopressin (VP) and oxytocin (OT) immunoreactive (ir) neurons at different developmental stages (PND2, PND9, and PND21) in the **(A,B)** paraventricular nucleus of the hypothalamus (PVN), **(C,D)** supraoptic nucleus of the hypothalamus (SON), **(E)** anterior hypothalamus (AH), **(F)** medial preoptic nucleus (MPO), **(G)** suprachiasmatic nucleus (SCN), and **(H)** the bed nucleus of the stria terminalis (BST). Letters above graphs (a, b, c) indicate statistical similarity.

## **Results: Nonapeptide neural activity (Fos colocalization)**

Surprisingly, we did not observe a main effect of Condition or a significant Sex × Condition interaction for VP-Fos or OT-Fos co-labeling for any of the VP and OT cell groups examined. These findings mirror the lack of significance for the Age × Condition interaction in the main text. These data suggest that nonapeptide-dependent neural activity, as assessed by Fos co-expression, does not differ based on our social manipulations.

## **Results: Fos responses**

### PVN Fos

Analysis of total (rostral and caudal levels combined) PVN Fos-ir yielded a main effect of Condition ( $F_{(2,150)} = 3.946$ ;  $p = 0.041$ ; LMM). However, posthoc analyses did not yield significant differences between groups. In addition, we did not find a Sex × Condition ( $F_{(2,150)} = 0.252$ ;  $p = 0.778$ ; LMM) interaction.

Separate analysis of rostral PVN Fos-ir also yielded a main effect of Condition ( $F_{(2,150)} = 3.323$ ;  $p = 0.039$ ; LMM), with Isolated pups exhibiting a trend to have more Fos-ir than subjects in the Together (Mean diff. = 41.326;  $p = 0.058$ ) condition. We did not observe a Sex × Condition ( $F_{(2,150)} = 0.345$ ;  $p = 0.709$ ; LMM) interaction.

Analysis of caudal PVN Fos-ir did not yield a main effect of Condition ( $F_{(2,150)} = 2.759$ ;  $p = 0.066$ ; LMM) or a significant Sex × Condition interaction ( $F_{(2,150)} = 0.157$ ;  $p = 0.855$ ; LMM).

### SON Fos

We did not observe a main effect of Condition ( $F_{(2,152)} = 1.418$ ;  $p = 0.245$ ; LMM) or a significant Sex × Condition interaction ( $F_{(2,152)} = 0.087$ ;  $p = 0.917$ ; LMM) for SON Fos-ir.

### AH Fos

Analyses did not yield a main effect of Condition ( $F_{(2,147)} = 0.043$ ;  $p = 0.958$ ; LMM) or a significant Sex × Condition interaction ( $F_{(2,147)} = 0.585$ ;  $p = 0.558$ ; LMM) for AH Fos-ir.

### SCN Fos

We did not find a main effect of Condition ( $F_{(2,148)} = 0.895$ ;  $p = 0.411$ ; LMM) or a significant Sex × Condition interaction ( $F_{(2,148)} = 0.161$ ;  $p = 0.851$ ; LMM) for SCN Fos-ir.

### MPO Fos

Analyses of MPO Fos-ir revealed a main effect of Condition ( $F_{(2,154)} = 6.241$ ;  $p = 0.002$ ; LMM). Posthoc analyses revealed that subjects in the Together condition exhibited significantly less Fos-ir compared to subjects that were Isolated from (Mean diff. = 25.893;  $p = 0.001$ ) or Reunited with (Mean diff. = 20.511;  $p = 0.009$ ) their families. The Age × Condition interaction presented in the main text suggests that this effect is driven by PND21 pups.

We did not observe a significant Sex × Condition interaction ( $F_{(2,154)} = 0.381$ ;  $p = 0.684$ ; LMM).

### BST Fos

We did not find a main effect of Condition ( $F_{(2,150)} = 0.369$ ;  $p = 0.692$ ; LMM) or a significant Sex × Condition interaction ( $F_{(2,150)} = 0.412$ ;  $p = 0.663$ ; LMM) for BST Fos-ir.
